# Supplementary material for: Correlation of EGFR-expression with safety and efficacy outcomes in SQUIRE: a randomized, multicenter, open-label, phase III study of gemcitabine–cisplatin plus necitumumab versus gemcitabine–cisplatin alone in the first-line treatment of patients with stage IV squamous non-small-cell lung cancer
Source: PubMed Central journal article supplement — Ann Oncol. 2016 May 20;27(8):1573–9. doi: 10.1093/annonc/mdw214 (PMC4959928; doi:10.1093/annonc/mdw214), 2016-05-20

### Supplementary Figure S1 EGFR IHC percent positive cells.

Histogram of IHC staining of percent positive cells in patients with EGFR IHC results.

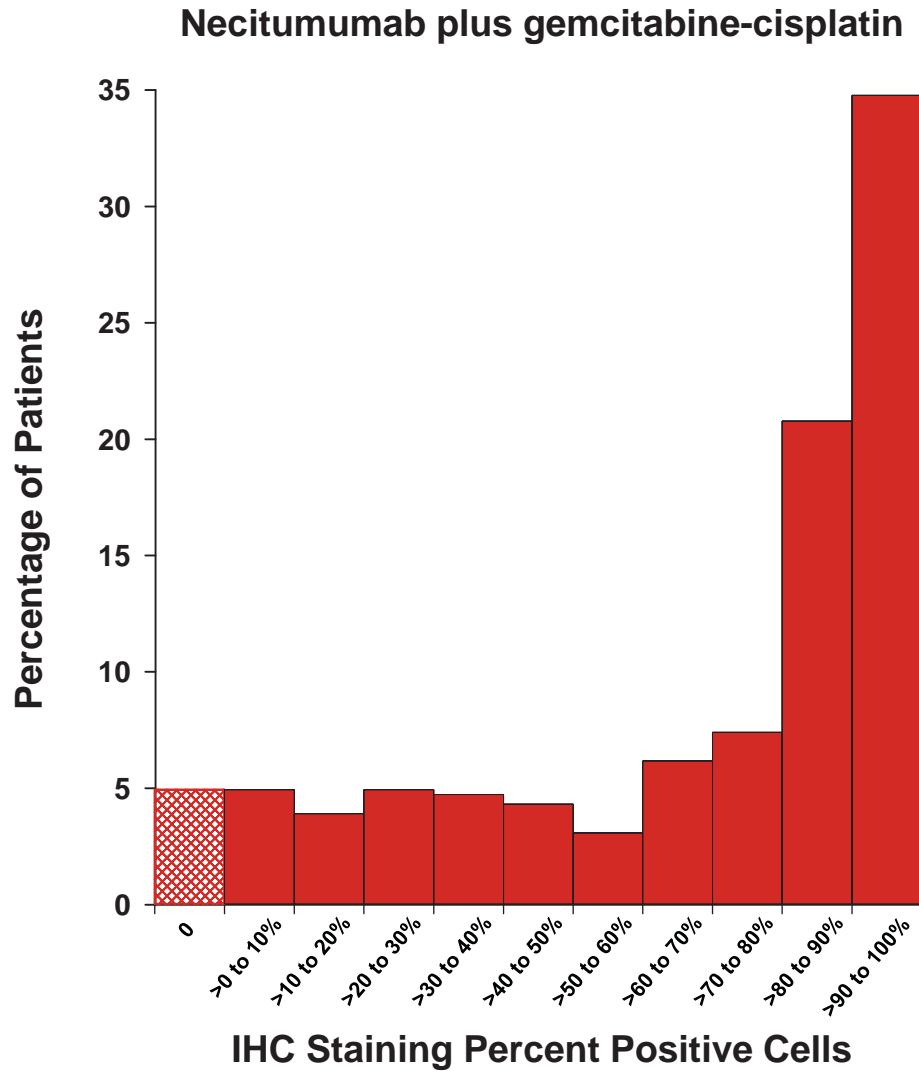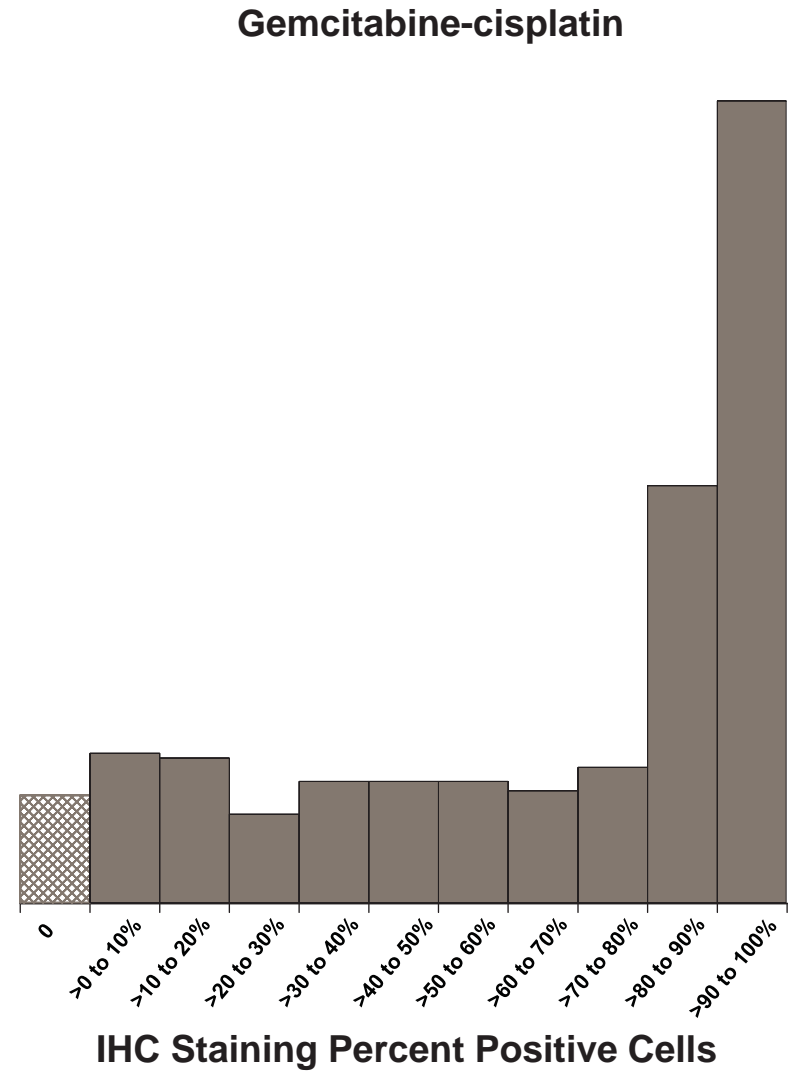

**Supplementary Figure S2** Sensitivity analysis of OS censoring at the start of post-study docetaxel.

OS censoring at the start of post-study docetaxel (EGFR>0 subpopulation).

Abbreviations: HR=hazard ratio; CI=confidence interval.

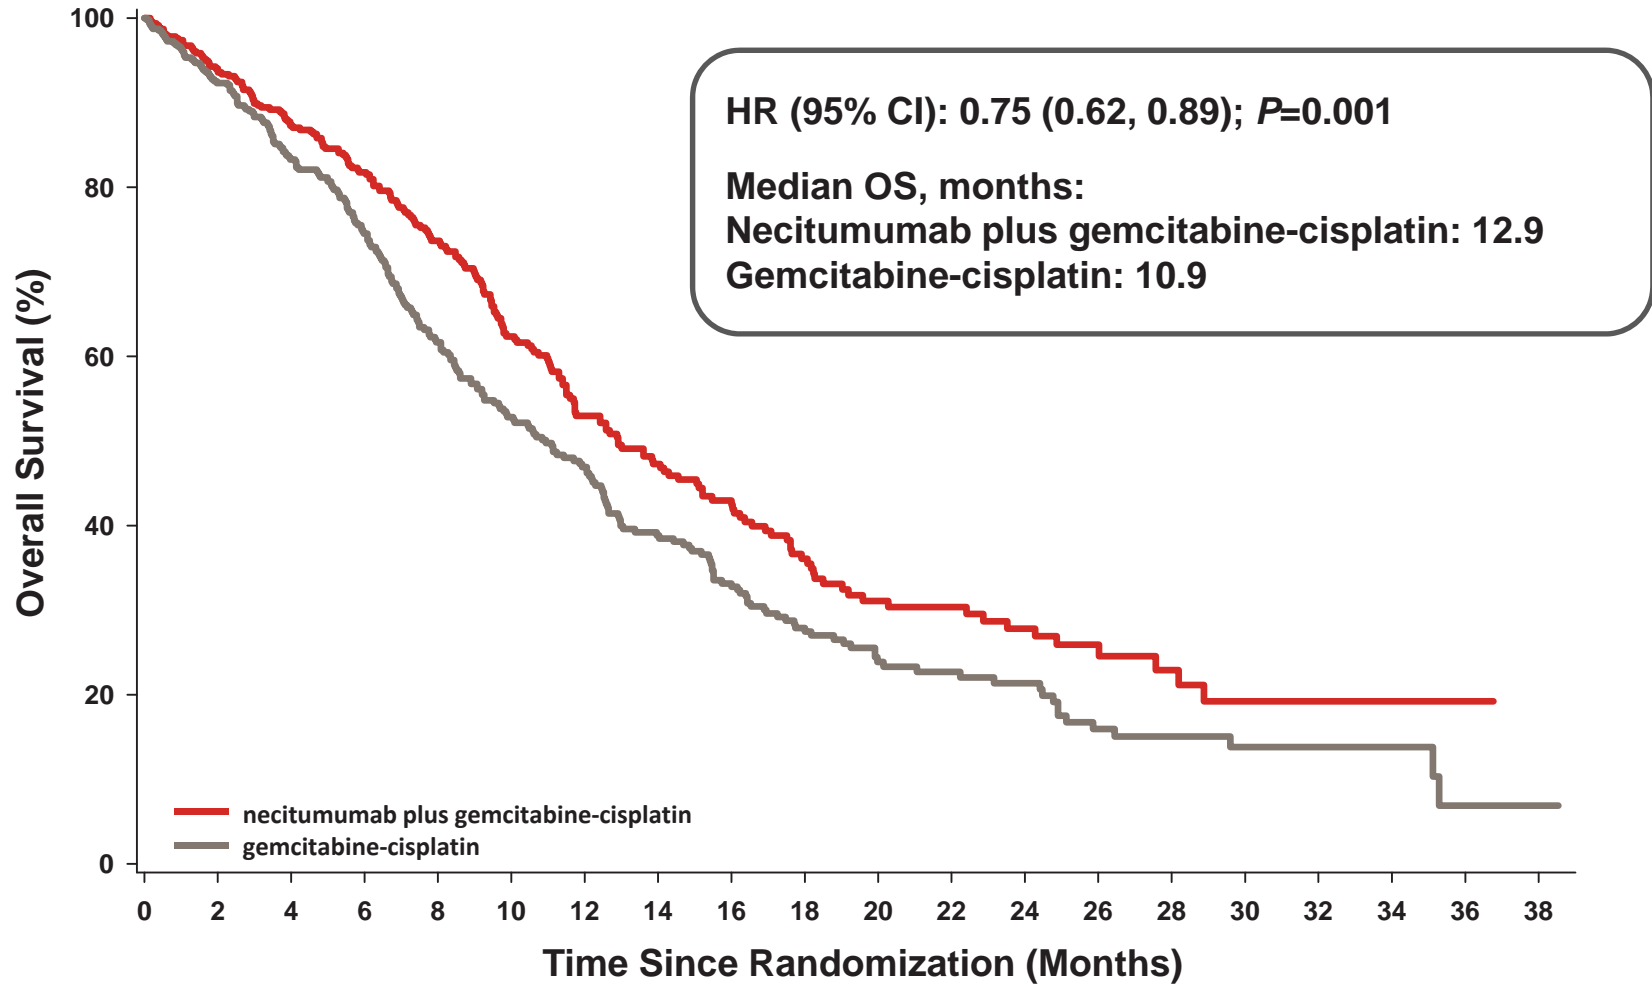

**Supplementary Figure S3** Subpopulation treatment effect pattern plot analyses of hazard ratios for OS and PFS.  
OS (A) and PFS (B) based on EGFR IHC percent positive. Note: Analyses are stratified.

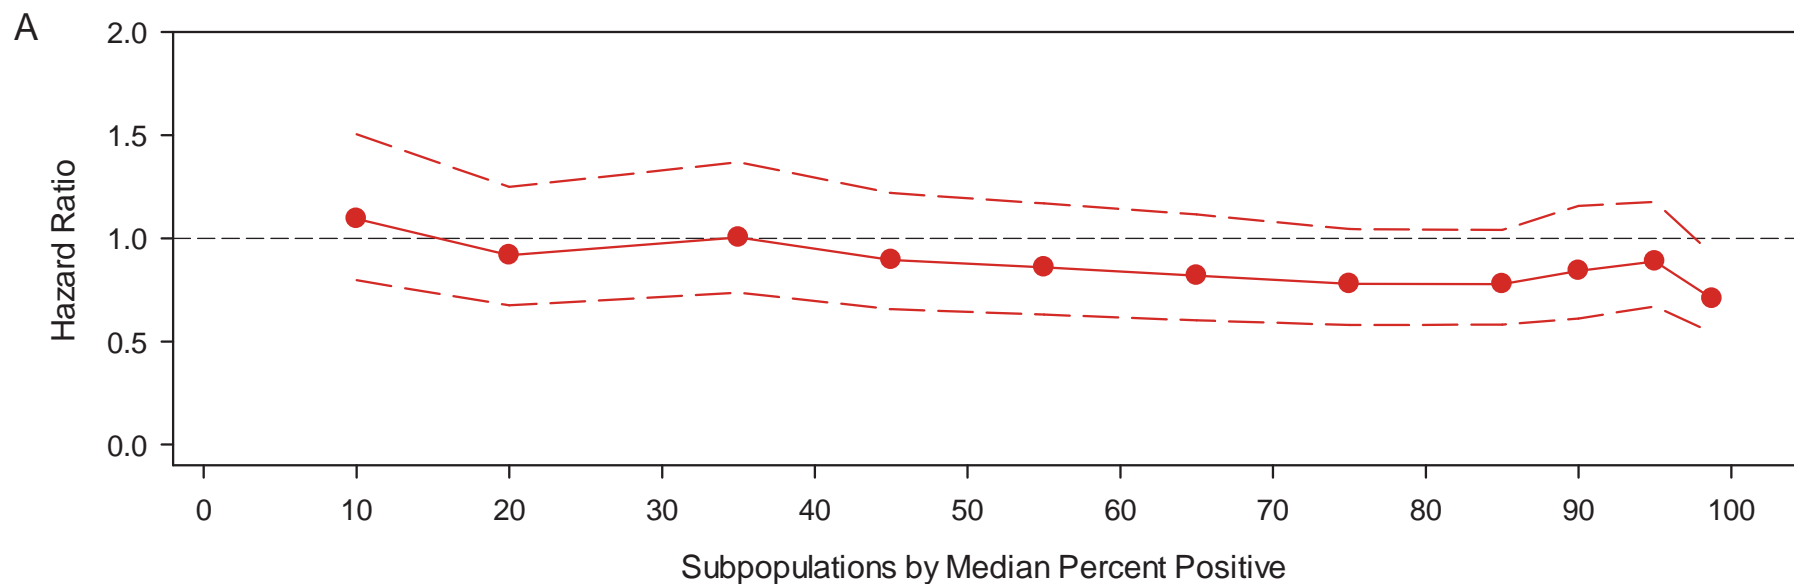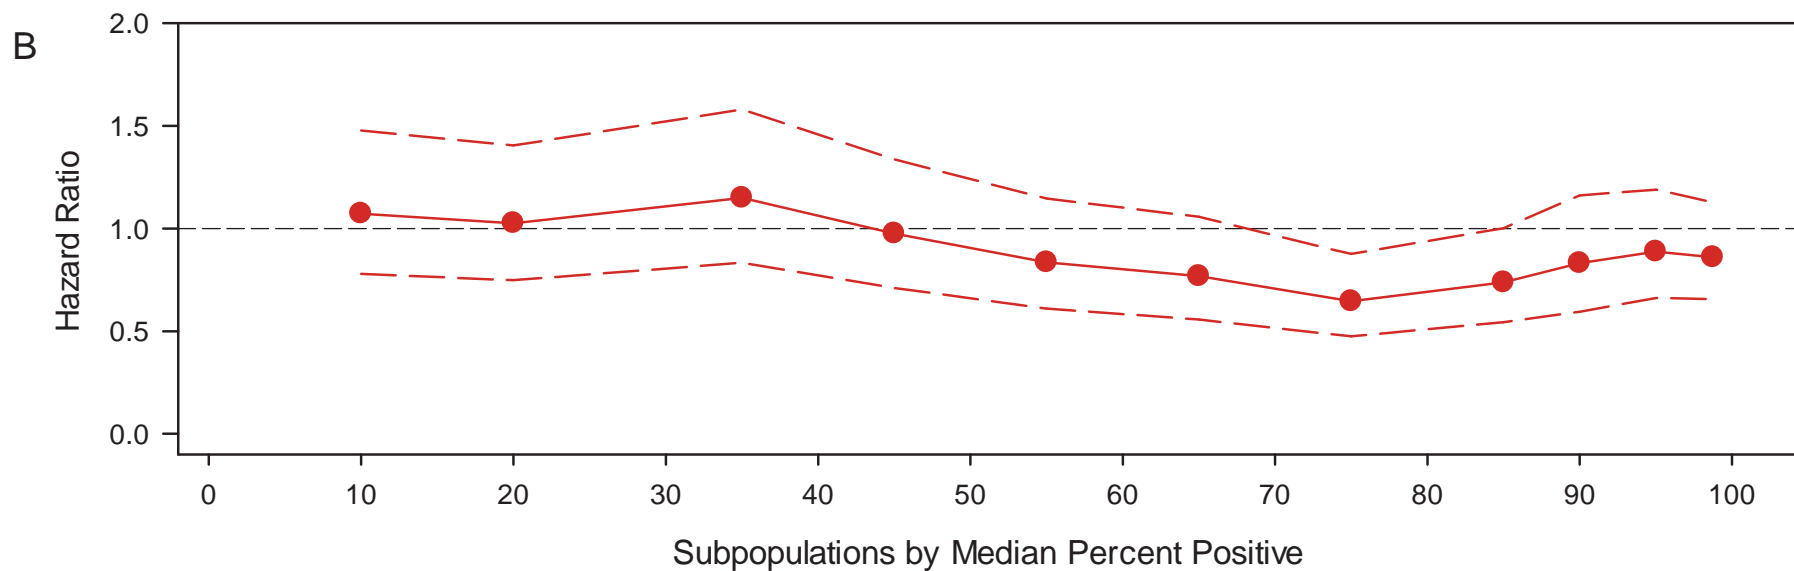

Supplement: supp_mdw214_mdw214supp_figs.pdf [file supp_mdw214_mdw214supp_figs.pdf]
